# Supplementary material for: A lithium iron phosphate/nitrogen-doped reduced graphene oxide nanocomposite as a cathode material for high-power lithium ion batteries
Source: Royal Society of Chemistry journal article supplement (doi:10.1039/c4ta01075b), 2014-01-01
Supplement: c4ta01075b1.pdf [file c4ta01075b1.pdf]

*Supplementary data*

**Lithium iron phosphate/nitrogen-doped reduced graphene oxide  
nanocomposite as a cathode material for high power lithium ion  
batteries**

Jong-Pil Jegal, Kwang-Chun Kim, Myeong Seong Kim, and Kwang-Bum Kim\*

*Department of Materials Science and Engineering, Yonsei University, 134 Shinchon-  
dong, Seodaemun-gu, Seoul, 120-749, Republic of Korea*

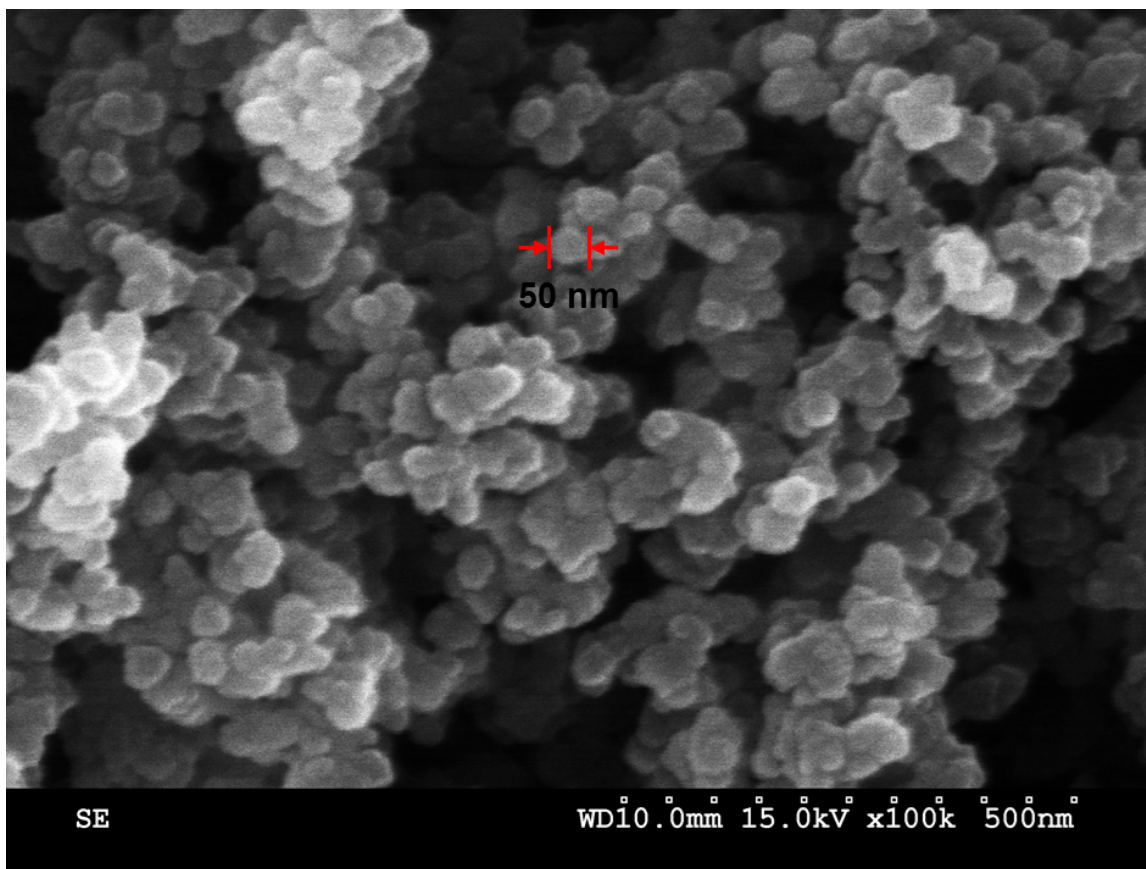

**Figure S1.** SEM image of the FePO<sub>4</sub>·H<sub>2</sub>O nanoparticles synthesized by a simple precipitation method using H<sub>2</sub>O<sub>2</sub> as the oxidizing agent

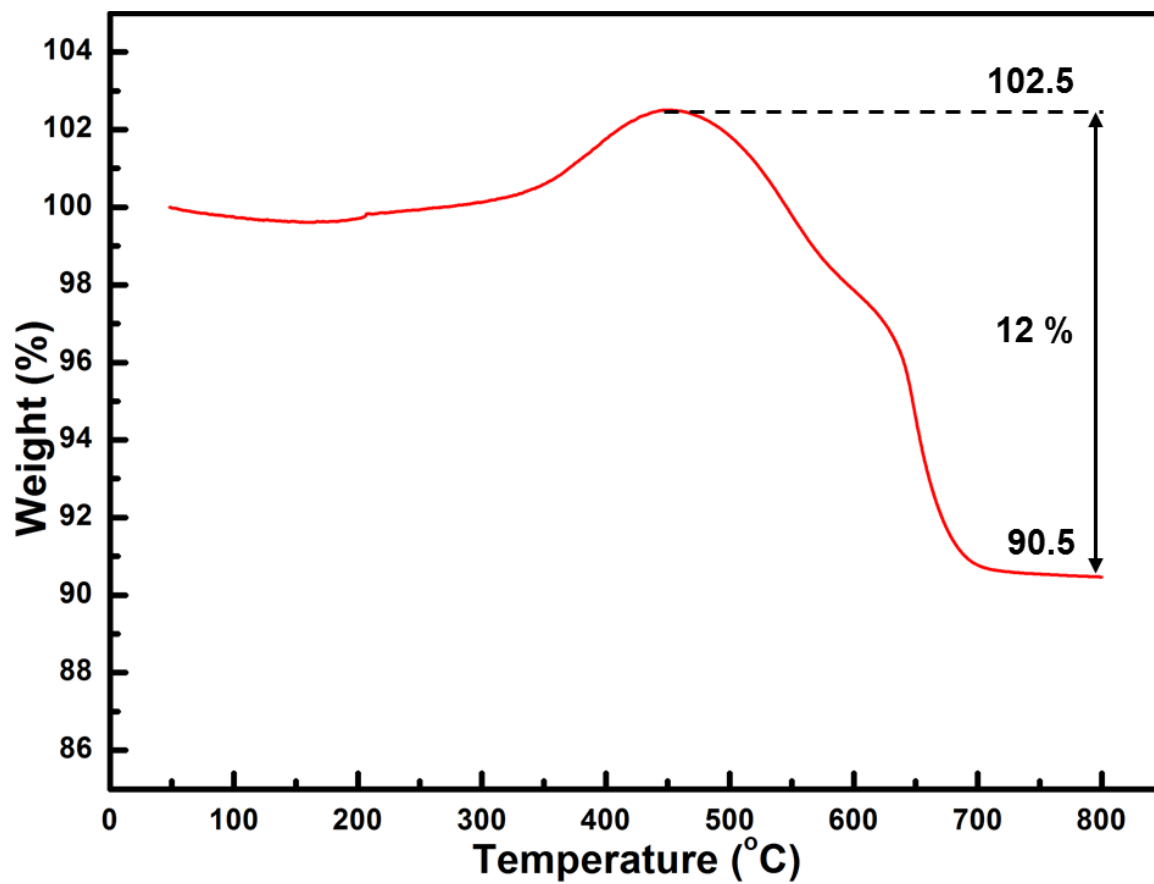

Figure S2. TGA curve of the LiFePO<sub>4</sub>/NrGO nanocomposite

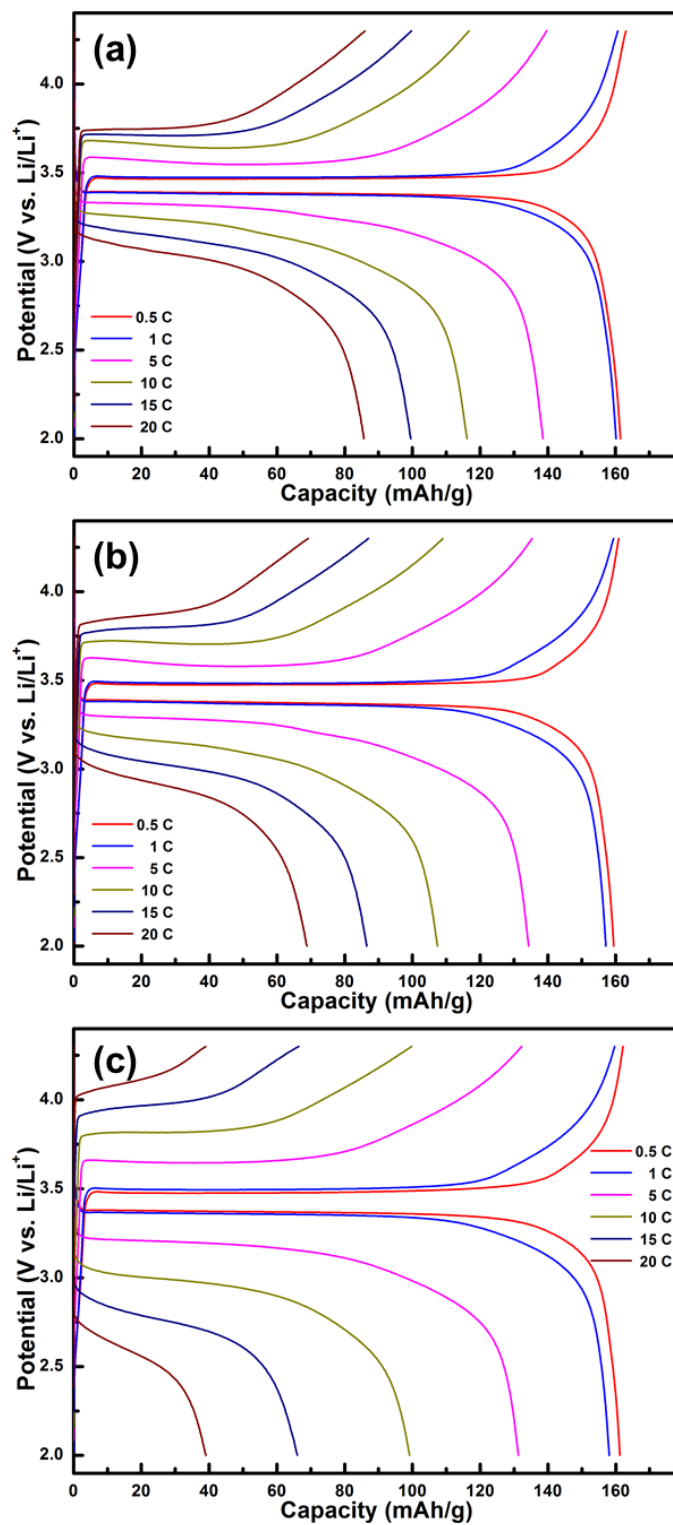

**Figure S3.** Charge-discharge profiles of the control electrode fabricated with commercial  $\text{LiFePO}_4$  nanoparticles at the electrode thickness of (a) 8, (b) 21, and (c) 37  $\mu\text{m}$ .

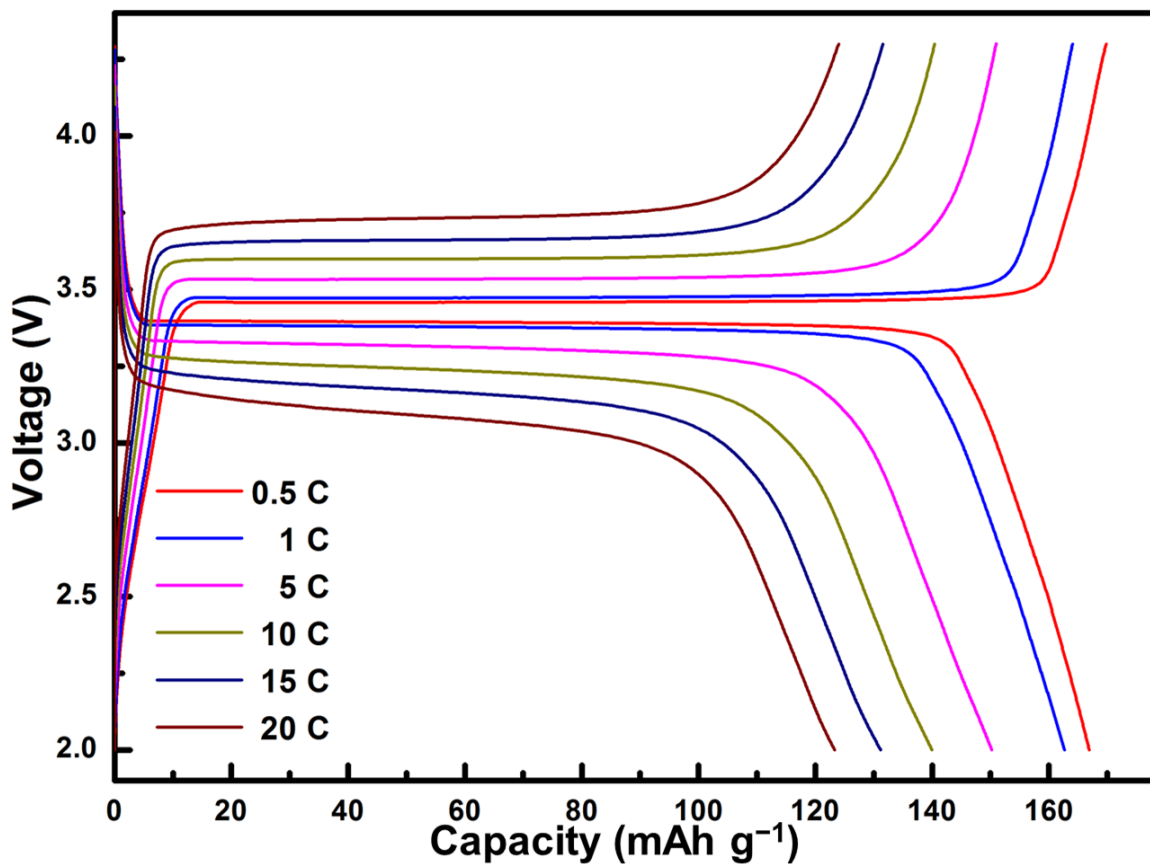

**Figure S4.** Charge-discharge profiles of the LiFePO<sub>4</sub>/rGO synthesized with the same synthetic method except the addition of urea at the electrode thickness of 11  $\mu\text{m}$ .

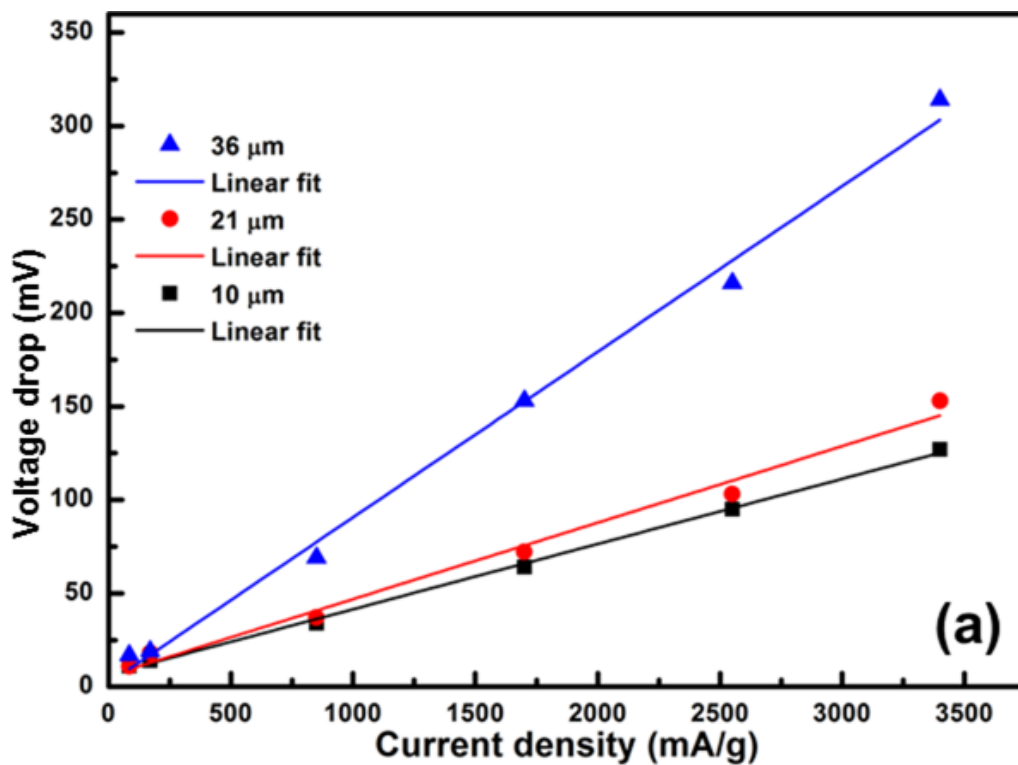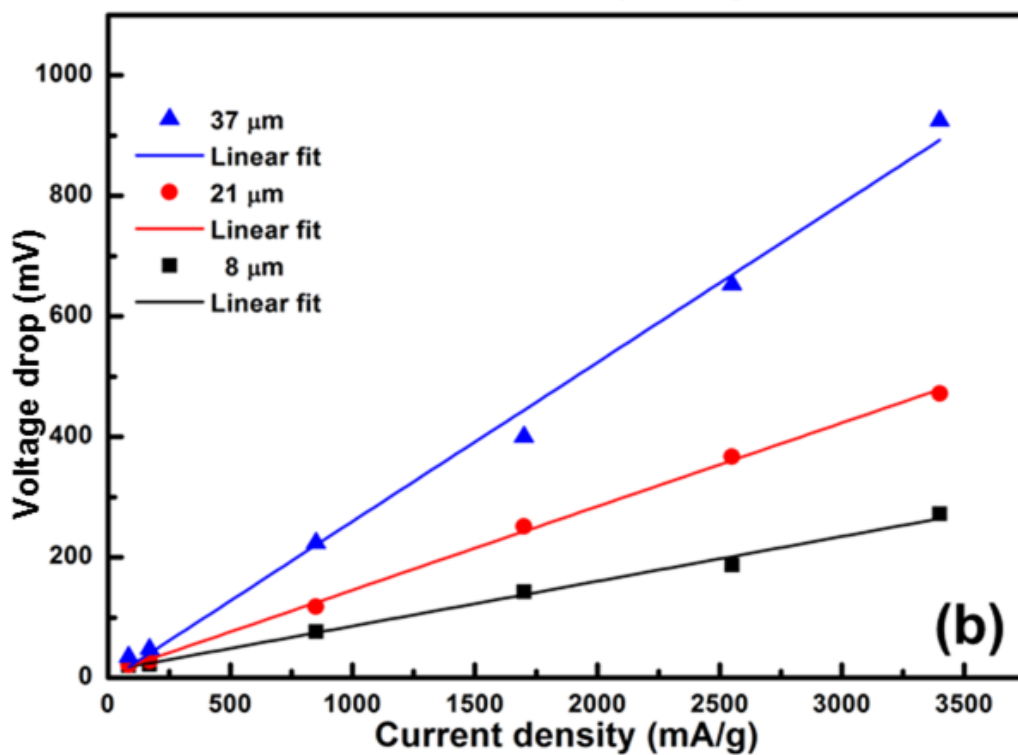

**Figure S5.** Initial voltage drop of electrodes fabricated with (a) LiFePO<sub>4</sub>/NrGO nanocomposite, and (b) commercial LiFePO<sub>4</sub> nanoparticles.

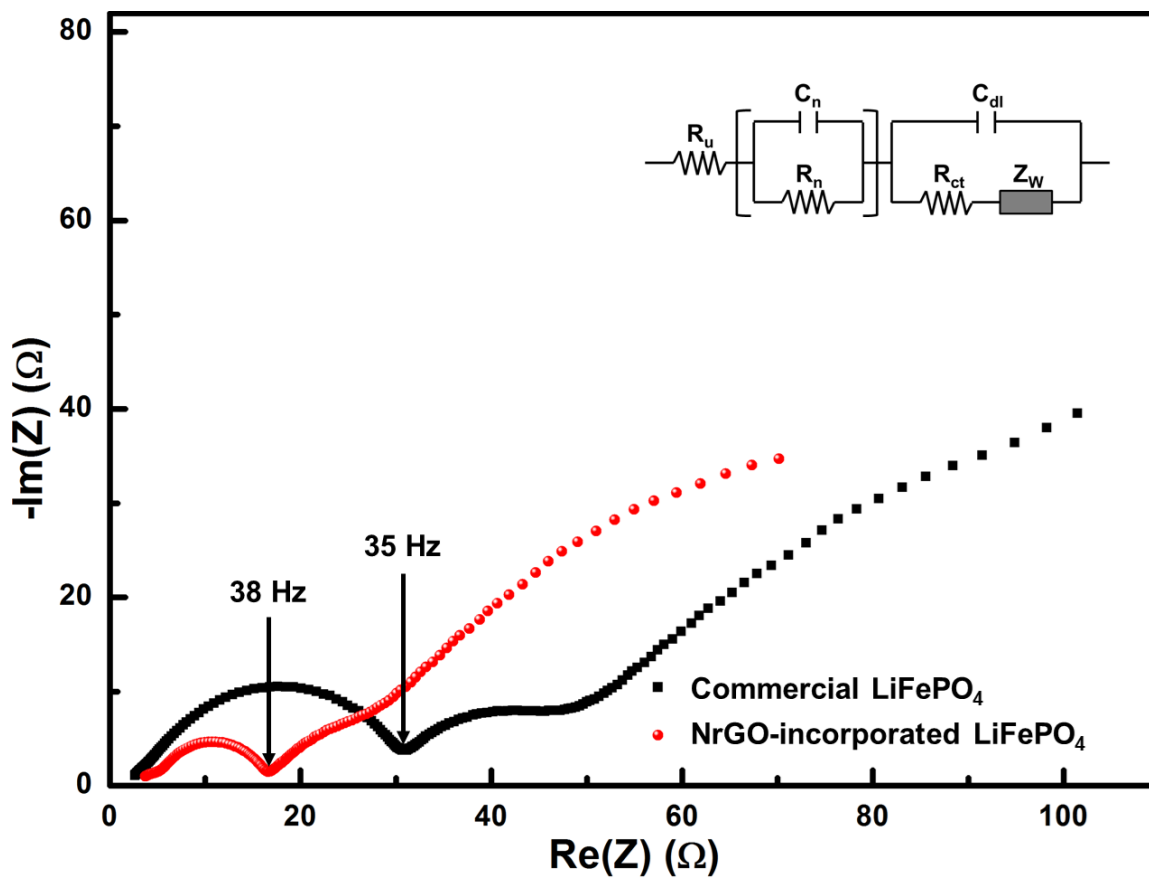

**Figure S6.** EIS data for the electrodes fabricated with the  $\text{LiFePO}_4/\text{NrGO}$  nanocomposite and the commercial  $\text{LiFePO}_4$  nanoparticles.

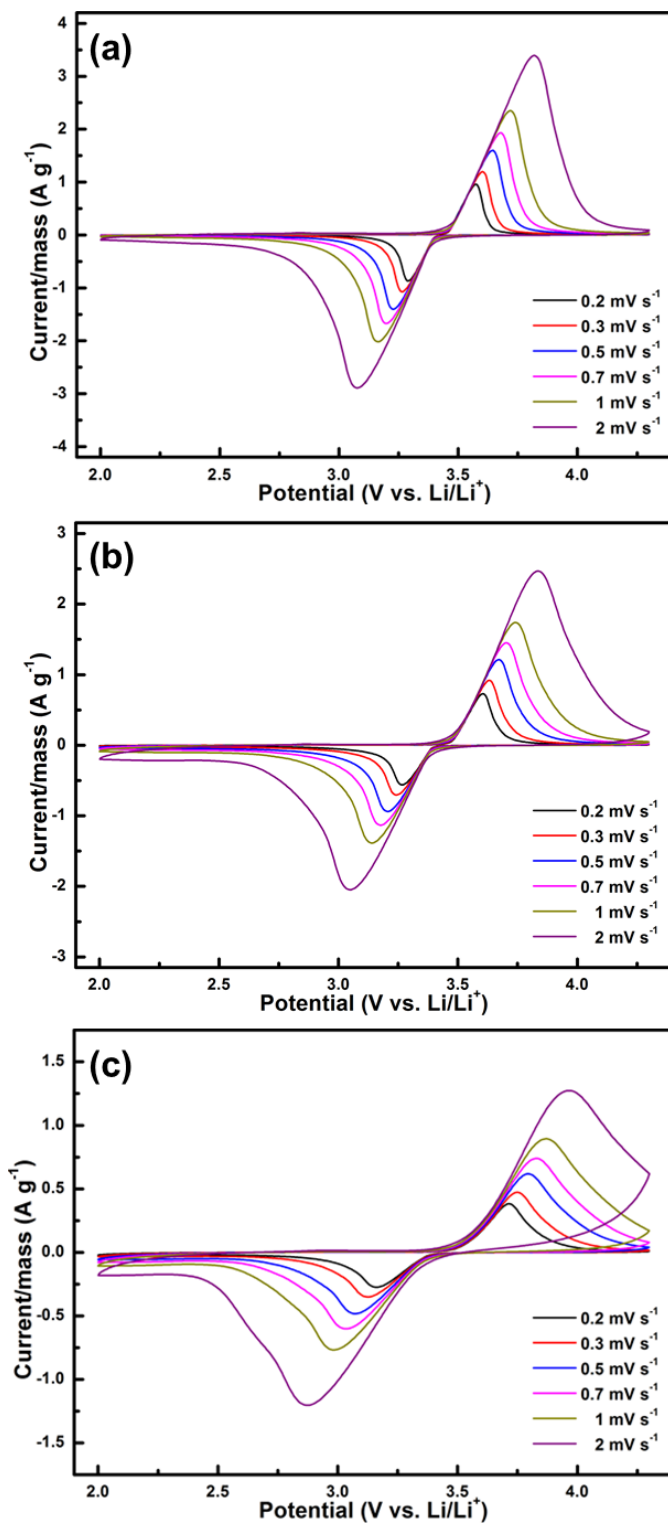

**Figure S7.** Cyclic voltammograms of the  $\text{LiFePO}_4/\text{NrGO}$  nanocomposite measured at (a) 25, (b) 0, and (c) -20 °C.

Table S1a. Apparent diffusion coefficients of the LiFePO<sub>4</sub>/NrGO nanocomposite according to the temperatures.

| Temperature (°C) | D <sub>cathodic</sub> (cm <sup>2</sup> s <sup>-1</sup> ) | D <sub>anodic</sub> (cm <sup>2</sup> s <sup>-1</sup> ) |
|------------------|----------------------------------------------------------|--------------------------------------------------------|
| 25               | 9.27 × 10 <sup>-15</sup>                                 | 1.29 × 10 <sup>-14</sup>                               |
| 0                | 4.66 × 10 <sup>-15</sup>                                 | 6.80 × 10 <sup>-15</sup>                               |
| -20              | 1.62 × 10 <sup>-15</sup>                                 | 1.80 × 10 <sup>-15</sup>                               |

Table S1b. Apparent diffusion coefficients of the commercial LiFePO<sub>4</sub> obtained at 25 °C.

| Temperature (°C) | D <sub>cathodic</sub> (cm <sup>2</sup> s <sup>-1</sup> ) | D <sub>anodic</sub> (cm <sup>2</sup> s <sup>-1</sup> ) |
|------------------|----------------------------------------------------------|--------------------------------------------------------|
| 25               | 8.94 × 10 <sup>-15</sup>                                 | 1.09 × 10 <sup>-14</sup>                               |

Apparent diffusion coefficients of the Li<sup>+</sup> ions in the LiFePO<sub>4</sub>/NrGO nanocomposite and the commercial LiFePO<sub>4</sub> were calculated using Randle-Sevcik equation as follows:

$$I_p/m = 0.4463F(F/RT)^{1/2}A_e(D_{app})^{1/2}C_{Li}^* \nu^{1/2}$$

where,  $I_p$  is the peak current in amperes,  $m$  is the mass of electrodes,  $F$  is the Faraday constant,  $R$  is the gas constant,  $A_e$  is the surface area of the electrode,  $D_{app}$  is the apparent diffusion coefficient,  $C_{Li}^*$  is the initial concentration of Li in LiFePO<sub>4</sub> (0.0228 mol cm<sup>-3</sup>), and  $\nu$  is the scan rate in V/s.
